# Supplementary material
Source: PubMed Central journal article supplement (PMC5010978)
Supplement: NIHMS805191-supplement-1.pdf [file NIHMS805191-supplement-1.pdf]

## Supplemental Figures

### Suppression of Glut1 and Glucose Metabolism by Decreased Akt/mTORC1 Signaling Drives T Cell Impairment in B Cell Leukemia

**Authors:** Peter J. Siska<sup>\*,†</sup>, Gerritje J. W. van der Windt<sup>‡</sup>, Rigel J. Kishton<sup>\*</sup>, Sivan Cohen<sup>\*</sup>, William Eisner<sup>§</sup>, Nancie J. MacIver<sup>§</sup>, Arnon P. Kater<sup>¶,||</sup>, J. Brice Weinberg<sup>#,\*\*</sup>, and Jeffrey C. Rathmell<sup>\*,†</sup>

#### Affiliations:

\*Department of Pharmacology and Cancer Biology, Duke University, Durham, NC, USA

†Department of Pathology, Microbiology, and Immunology, Department of Cancer Biology, Vanderbilt Center for Immunobiology, Vanderbilt University Medical Center, TN, USA

‡Department of Experimental Immunology, Academic Medical Center, Amsterdam, The Netherlands;

§Department of Pediatrics, Duke University, Durham, NC, USA;

¶Department of Hematology, Academic Medical Center, Amsterdam, the Netherlands;

||Lymphoma and Myeloma Center Amsterdam, LYMMCARE, Amsterdam, the Netherlands;

#Department of Medicine, Duke University, Durham, NC, USA;

\*\*Department of Medicine, Durham VA Medical Center, Durham, NC, USA;

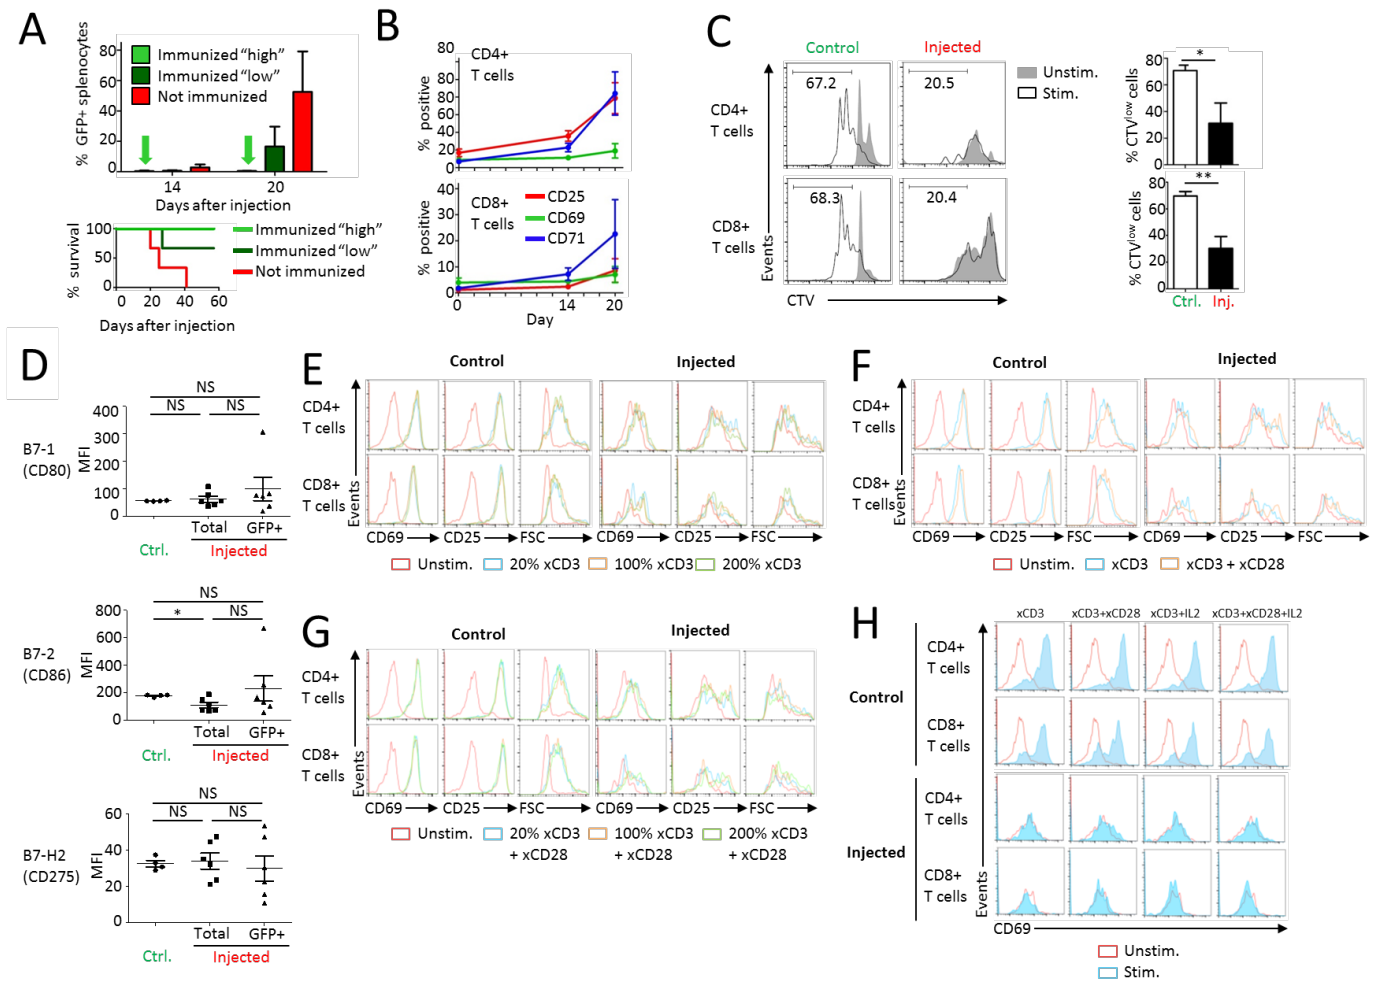

**Supplemental Figure 1. Murine B cell lymphoblastic leukemia model to assess leukemia associated T cell dysfunction.** BALB/c mice were injected with FL5.12 pro-B-cells harboring BCR/Abl. Leukemia associated T cells in spleens or leukemic cells in blood were analyzed at specified time points. **(A)** Survival and percentage of GFP<sup>+</sup> cells in blood 14 and 20 after injection of FL5.12 cells with or without immunization with low ( $0.1 \times 10^6$ ) or high ( $1 \times 10^6$ ) concentration of irradiated FL5.12 cells ( $n=3/\text{group}$ ). **(B)** Expression of activation markers CD25, CD69 and CD71 assessed by flow cytometry ( $n=3-4$  mice/group). **(C)** Splenic T cells were stimulated with anti-CD3 and proliferation of T cells from control animals ( $n=3$ ) or FL5.12 injected animals ( $n=2-3$ ) was measured using Cell Trace Violet dye. **(D)** Expression of B7-1, B7-2 and B7-H2 on total or GFP<sup>+</sup> splenocytes from injected or control animals. **(E-H)** Control mice ( $n=1-2$ ) or mice injected with FL5.12 cells ( $n=1-3$ ) were stimulated in indicated conditions and expression of activation markers was measured by flow cytometry.

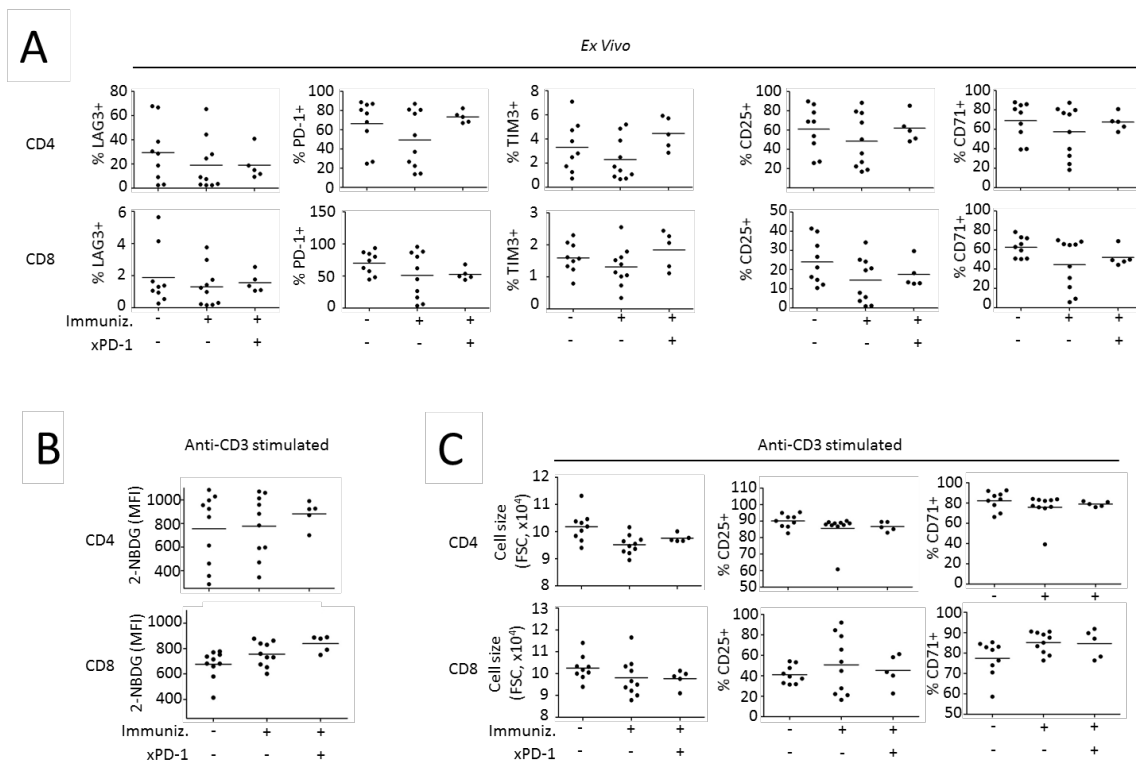

**Supplemental Figure 2. In vivo PD-1 blockade is not sufficient to revert B cell leukemia induced T cell dysfunction.** BALB/c mice were immunized with  $0.02 \times 10^6$  irradiated FL5.12 cells seven days prior to leukemia transfer. Immunized mice were injected with live FL5.12 cells and were subject to i.p. anti-PD-1 therapy ( $250 \mu\text{g}/\text{mouse}$ ) every three days for total of four doses. **(A)** Expression of activation and exhaustion markers *ex vivo*. Glucose uptake **(B)**, cell size and expression of CD25 and CD71 **(C)** on T cells from leukemia bearing animals with or without anti-PD-1 therapy.

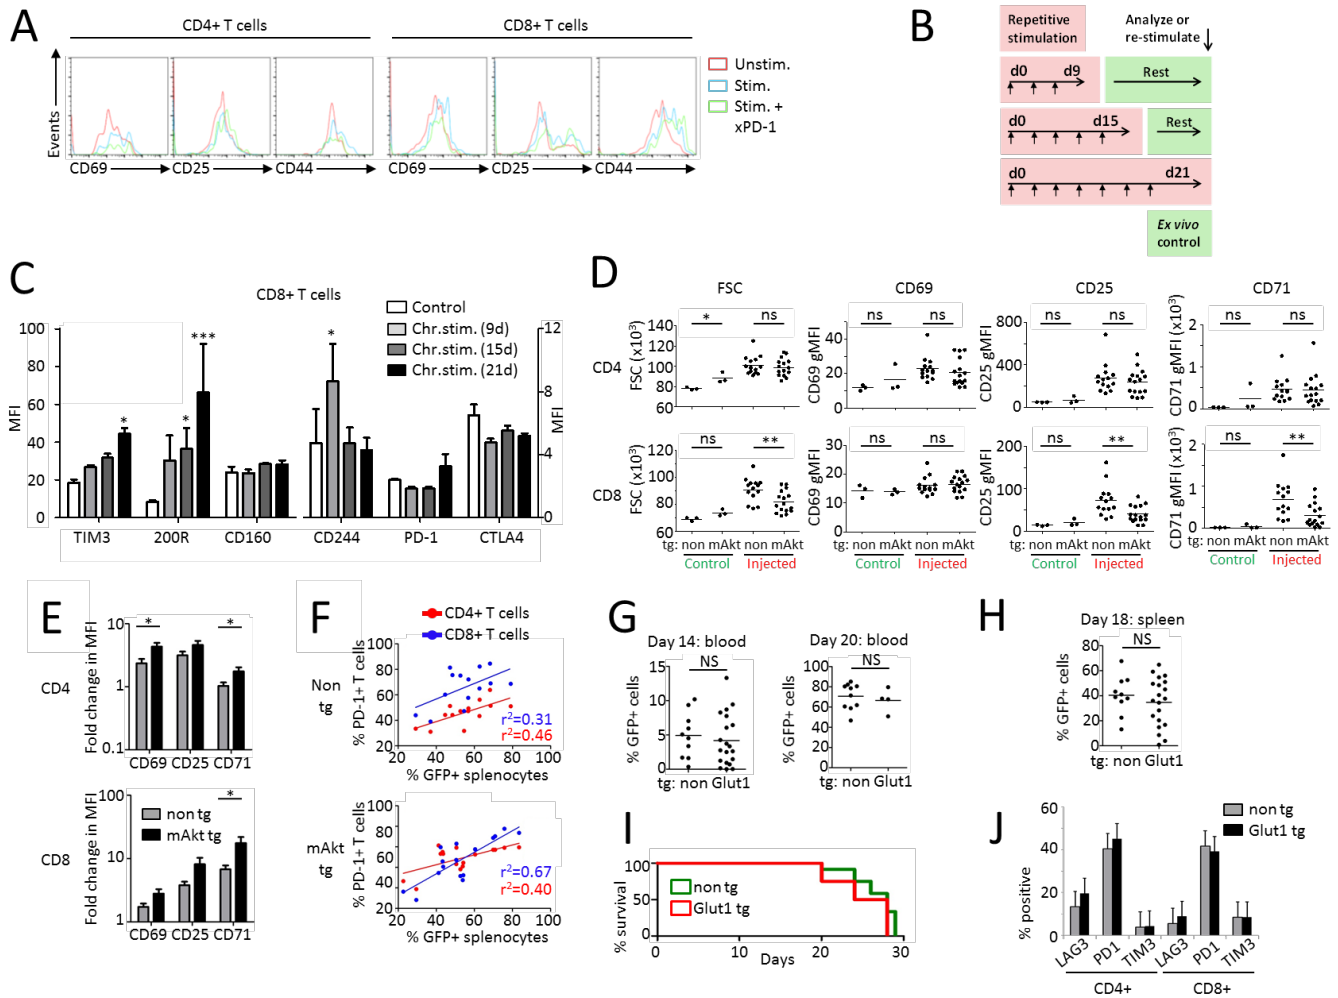

**Supplemental Figure 3. The role of inhibitory pathways and chronic stimulation in the induction of metabolic T cell dysfunction.** (A) T cells from FL5.12 leukemia-bearing mice were *in vitro* stimulated with or without anti-PD-1 treatment and expression of specified markers was assessed by flow cytometry. (B-C) Purified healthy human blood T cells were repeatedly stimulated with low-dose anti-CD3, anti-CD28, anti-CD2 coated beads for indicated times with or without rest until restimulation on day 21. (B) Model. (C) Expression of specified markers on CD8+ T cells. (D-F) Splenic T cells from FL5.12 injected mice with (n=16) or without (n=14) T cell specific mAkt tg were stimulated over-night with anti-CD3 and expression of CD69, CD25 and CD71 was measured with flow cytometry. Fold change in MFI was calculated as the MFI ratio of stimulated/unstimulated cells. (G,H) Splenocytes and blood samples from FL5.12 injected mice with or without T cell specific Glut1 tg were analyzed 14 or 20 days after injection and percentage of GFP+ cells was assessed with flow cytometry. (I) Survival of FL5.12 injected mice with (n=4) or without (n=12) T cell specific Glut1 tg. (J) *Ex vivo* expression of indicated markers on T cells from mice described in G,H. Data are mean  $\pm$  s.e.m. \* P < 0.05, \*\* P < 0.01 and \*\*\* P < 0.001.

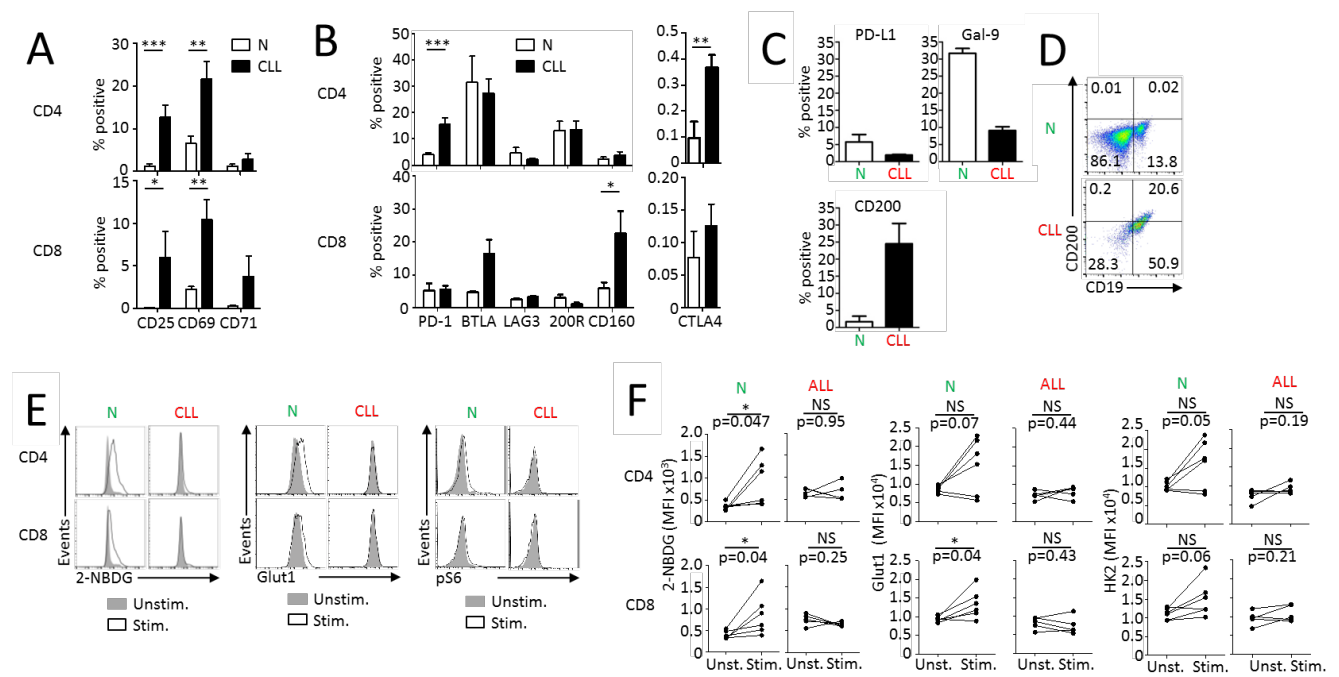

**Supplemental Figure 4. T cells from human B cell leukemia patients show signs of chronic stimulation and exhaustion that correlate with metabolic defects after *in vitro* stimulation.** (A,B) Peripheral blood mononuclear cells (PBMCs) from 5-8 healthy donors (N) and CLL patients (n=6) were analyzed for the specified markers using flow cytometry. The percentage of positive cells was established using not stained controls. (C,D) Expression of PD-L1, Gal-9 and CD200 measured on total PBMCs (C) or CD19+ B cells (D) from healthy donors (n=2) and CLL patients (n=6). (E) CLL cohort 2 was analyzed as CLL cohort 1 (Fig. 5E). PBMCs from CLL patients (n=5) or healthy controls (n=4) were stimulated for three days with anti-CD3 and indicated measurements were performed using flow cytometry. (F) Samples from healthy controls (n=5) or BCR/Ab1+ B cell ALL patients (n=5) were stimulated and analyzed as in E.

A

| Nr.                              | Sex | Age (yr.)    | WBC   | Ever treated | Rai stage      | FISH      | Zap70 | IgH mutated |
|----------------------------------|-----|--------------|-------|--------------|----------------|-----------|-------|-------------|
|                                  |     | At draw date |       |              | (at diagnosis) |           |       |             |
| <b>CLL Cohort 1 Patient Data</b> |     |              |       |              |                |           |       |             |
| 3                                | m   | 47           | 105.4 | no           | 0              | 13q+17p   | pos   | no          |
| 4                                | f   | 71           | 43.2  | no           | 0              | 13q       | pos   | yes         |
| 5                                | f   | 68           | 95.9  | no           | 0              | tri12     | pos   | no          |
| 7                                | m   | 67           | 37.9  | yes          | 0              | 11q+13q   | pos   | ND          |
| 8                                | m   | 67           | 33.7  | no           | 0              | 17p       | neg   | no          |
| 9                                | m   | 61           | 105.5 | yes          | 2              | 13q       | pos   | yes         |
| 19                               | f   | 67           | 27.5  | no           | 0              | 13q+tri12 | neg   | yes         |
| 20                               | m   | 63           | 283.2 | no           | 0              | 13q       | pos   | no          |
| 21                               | f   | 86           | 53.7  | yes          | 0              | 13q+17p   | neg   | no          |
| 26                               | f   | 55           | 54.3  | no           | 0              | 13q       | neg   | yes         |
| 27                               | m   | 78           | 37.1  | yes          | 0              | 17p+tri12 | neg   | yes         |
| 28                               | f   | 87           | 61    | yes          | 1              | 17p       | neg   | yes         |
| 29                               | f   | 68           | 25.9  | no           | 0              | normal    | neg   | yes         |
| 30                               | m   | 72           | 33.9  | yes          | 0              | tri12     | neg   | yes         |
| 31                               | f   | 73           | 103.2 | no           | 0              | ND        | pos   | yes         |
| 32                               | f   | 62           | 32.5  | no           | 0              | ND        | neg   | yes         |
| 33                               | m   | 48           | 269   | no           | 1              | ND        | neg   | no          |
| 34                               | m   | 73           | 150.3 | no           | 0              | tri12     | neg   | no          |
| 36                               | m   | 66           | 88.1  | no           | 2              | ND        | pos   | no          |
| 39                               | m   | 79           | 45.8  | yes          | 0              | 17p+tri12 | neg   | yes         |
| 40                               | m   | 61           | 126.6 | yes          | 2              | 13q       | pos   | yes         |
| 41                               | m   | 73           | 43.3  | no           | 0              | 13q       | pos   | yes         |
| 42                               | m   | 63           | 36.6  | no           | ND             | ND        | pos   | ND          |
| 43                               | m   | 79           | 12    | yes          | 0              | 13q       | pos   | yes         |
| 44                               | m   | 71           | 62.1  | no           | 0              | normal    | neg   | yes         |
| 45                               | m   | 69           | 33.5  | no           | 0              | 13q       | pos   | no          |
| 46                               | m   | 75           | 37    | no           | 0              | 13q       | pos   | yes         |
| 47                               | m   | 60           | 17.1  | no           | 0              | 13q       | neg   | ND          |
| 14                               | m   | 64           | 58.2  | no           | 0              | tri12     | pos   | no          |
| 38                               | f   | 74           | 49.2  | no           | 0              | 13q       | neg   | yes         |
| 37                               | ND  | 58           | 70.8  | no           | ND             | ND        | neg   | yes         |
| 30                               | ND  | 72           | 33.9  | yes          | 0              | tri12     | pos   | yes         |
| <b>CLL Cohort 2 Patient Data</b> |     |              |       |              |                |           |       |             |
| 1292                             | m   | 55           | 85.6  | no           | 0              | ND        | ND    | yes         |
| 1706                             | m   | 66           | 74.6  | no           | 0              | ND        | ND    | ND          |
| 1664                             | m   | 66           | 32.07 | no           | 2              | ND        | ND    | ND          |
| 1418                             | v   | 64           | 115   | no           | 0              | ND        | ND    | polyclonal  |
| 1754                             | m   | 46           | 180   | no           | ND             | ND        | ND    | ND          |

B

| <b>ALL Patient Data</b> |     |           |                                                                                         |                                                              |         |  |
|-------------------------|-----|-----------|-----------------------------------------------------------------------------------------|--------------------------------------------------------------|---------|--|
| Nr.                     | Sex | Age (yr.) | Karyotype                                                                               | Phenotype                                                    | Blast % |  |
| 15-08-020               | m   | 63        | 46,XY,t(9;22)(q34;q11.2)[1]/47~48,idem, +2,+5,+8[cp5]/46,XY[1]                          | 93% of cells = B-Lymphoblasts (CD19+, CD20-)                 | 87.5    |  |
| 15-11-009               | f   | 59        | 46,XX,t(9;22)(q34;q11.2)[1]/46,idem,del(12)(p13),der(19)t(17;19)(q21;p13)[16]/ 46,XX[3] | Abnormal B-Lymphoblasts. CD10+, CD19+, CD34(+), CD58+, CD20- | 80      |  |
| 16-01-019               | m   | 67        | 39~43,XY,add(1)(p36.3),-3,-7-9,t(9;22)(q34;q11.2),-13,-14,+mar[cp17]/46,XY[3]           | B Lymphoblasts; CD9+, CD19+, CD34(+), CD58+, CD20-           | 95      |  |
| 110304A                 | m   | 43        | 46,XY,t(9;22)(q34;q11.2)[2]/46,XY[5]                                                    | CD19+, CD33-, CD45dim lymphoblasts                           | 100     |  |
| 110615B                 | m   | 70        | 46,XY,t(9;22)(q34;q11.2)[20]                                                            | Atypical blasts CD19+, CD10+, CD34+, CD20-                   | 51.5    |  |

Supplemental Table 1. Patient Characteristics.
